## Developmental expression and cellular localization of glucose transporter molecules during mouse preimplantation development

MARYAM AGHAYAN<sup>1</sup>, L. V. RAO<sup>2</sup>, ROBERT M. SMITH<sup>3</sup>, LEONARD JARETT<sup>3</sup>, MAUREEN J. CHARRON<sup>4</sup>, BERNARD THORENS<sup>5</sup> and SUSAN HEYNER<sup>1,\*</sup>

<sup>1</sup>*Department of Obstetrics and Gynecology, University of Pennsylvania Medical Center, 36th and Hamilton Walk, Philadelphia, PA 19104, USA*

<sup>2</sup>*Department of Obstetrics and Gynecology, Metro Health Medical Center, Case Western Reserve University, Cleveland, OH 44109, USA*

<sup>3</sup>*Department of Pathology and Laboratory Medicine, University of Pennsylvania Medical Center, Philadelphia, PA 19104, USA*

<sup>4</sup>*Department of Biochemistry, Albert Einstein College of Medicine, 1300 Morris Park Ave., Bronx, NY 10461, USA*

<sup>5</sup>*Whitehead Institute for Biomedical Research, Cambridge, MA 02142, USA*

\*To whom correspondence should be addressed

### Summary

Two general mechanisms mediate glucose transport, one is a sodium-coupled glucose transporter found in the apical border of intestinal and kidney epithelia, while the other is a sodium-independent transport system. Of the latter, several facilitated transporters have been identified, including GLUT1 (erythrocyte/brain), GLUT2 (liver) and GLUT4 (adipose/muscle) isoforms. In this study, we used Western-blot analysis and high resolution immunoelectron microscopy (IEM) to investigate the stage-related expression and cellular localization of GLUT1, 2 and 4. The Western blot results demonstrate that GLUT1 is detectable in the oocyte and throughout preimplantation development. GLUT2 isoforms were not detectable until the blastocyst stage, while the GLUT4 isoform was undetectable in the oocyte

through blastocyst stages. The present findings confirm previous studies at the molecular level which demonstrated that mRNAs encoding the same GLUT isoforms are detectable at corresponding developmental stages. GLUT1 and GLUT2 display different cellular distributions at the blastocyst stage as shown by IEM studies. GLUT1 has a widespread distribution in both trophectoderm and inner cell mass cells, while GLUT2 is located on trophoctoderm membranes facing the blastocyst cavity. This observation suggests a different functional significance for these isoforms during mouse preimplantation development.

Key words: mouse embryo, glucose transporters, preimplantation development

### Introduction

Two general mechanisms are involved in glucose transport across the plasma membrane of mammalian cells. A sodium-coupled glucose transporter has been described in the apical membrane of absorptive epithelial cells, such as in kidney and intestine (Esposito, 1984; Hediger et al., 1987). This transporter is inhibited by phlorizin, and indirectly by ouabain. The other glucose transport system, which is widely distributed, is mediated by a facilitated diffusion carrier that catalyzes glucose movement down its concentration gradient (Wheeler et al., 1985). This system is pharmacologically distinct from the sodium-coupled transporter, since phlorizin is without effect while phloretin and cytochalasin B are specific inhibitors.

In the mouse preimplantation embryo, Gardner and Leese (1988) concluded that the sodium-coupled transport system does not seem to play a role since glucose

uptake was not inhibited by phlorizin, and continued in sodium-free media. Studies by Benos (1981) in rabbit blastocysts also showed that glucose transport was sodium-independent. However, the participation of a Na<sup>+</sup>/glucose cotransport system in the induction of polarity across blastomeres of compacted 8-cell stage mouse embryos has been suggested recently (Wiley et al., 1991). At this stage, a solute transporter has been detected in the apical membrane of polar cells, with structural and immunological similarities to a renal Na<sup>+</sup>/glucose cotransport system.

A number of recent studies have used molecular biology techniques to demonstrate the existence of a family of facilitated glucose transporters (GLUT) (reviewed by Bell et al., 1990; Kasanicki and Pilch, 1990; Thorens et al., 1990). These transporters exhibit considerable homology in their primary sequence, but display a marked tissue-specific pattern of expression (Table 1). In adult tissues, GLUT1 (erythrocyte/brain)

Table 1. Human glucose transporters

| Designation                                         | Size<br>(Number of<br>amino acids) | Major sites of expression                         | Chromosome<br>location |
|-----------------------------------------------------|------------------------------------|---------------------------------------------------|------------------------|
| <b>a) facilitative glucose transporters</b>         |                                    |                                                   |                        |
| (1) GLUT 1 (Erythrocyte, HepG2, brain)              | 492                                | Fetal tissues, brain, kidney, colon               | 1                      |
| (2) GLUT 2 (Liver)                                  | 524                                | Liver, $\beta$ -cell, kidney, small intestine     | 3                      |
| (3) GLUT 3 (Fetal muscle)                           | 496                                | Many tissues including brain, placenta and kidney | 12                     |
| (4) GLUT 4 (Muscle/adipocyte, insulin-regulatable)  | 509                                | Skeletal muscle, heart, adipocytes                | 17                     |
| (5) GLUT 5 (Small intestine)                        | 501                                | Small intestine                                   | 1                      |
| <b>b) Na<sup>+</sup>/glucose co-transporter</b>     |                                    |                                                   |                        |
| (1) SGLT1 (Na <sup>+</sup> /glucose co-transporter) | 664                                | Small intestine                                   | 22                     |

Modified from Gould and Bell, 1990 and Hogan et al 1991

and GLUT3 (brain) isoforms appear to be responsible for basal glucose uptake. The GLUT2 isoform mediates glucose transport primarily in hepatocytes and pancreatic  $\beta$ -cells. GLUT4 is responsible for insulin-stimulated glucose uptake in muscle and adipose tissue, and GLUT5 is expressed in the small intestine. Of the five isoforms, GLUT4 is the major insulin-regulatable transporter in insulin-target tissues. Although GLUT1 expression is also modulated by insulin in muscle and fat cells, the effect is less significant because GLUT4 is the primary and most abundant transporter expressed in these cells (Walker et al., 1989; de Herreros and Birnbaum, 1989; Kasanacki and Pilch, 1990).

Expression of insulin receptors coincides with the switch to glucose as the preferred energy substrate at the 8-cell stage onwards in the mouse preimplantation embryo (Biggers and Borland, 1976). At this time, embryos cultured in vitro can first respond to exogenous insulin with accelerated rates of DNA, RNA and protein synthesis (Heyner et al., 1989; Rao et al., 1990). The present study was undertaken to examine the stage-related expression of glucose transporter proteins in the preimplantation mouse embryo.

## Materials and methods

### Animals and embryo recovery

Female mice (CD-1; 6 to 8 weeks old; Charles River Breeding Laboratories) were injected with 5 IU pregnant mare's serum gonadotropin (PMSG; Sigma Chemicals Co., St. Louis, MO) and 48 hours later with 5 IU human Chorionic Gonadotropin (hCG; Sigma). A single female was placed with a single caged male (CD-1; Charles River Breeding Laboratories) overnight. The presence of a vaginal plug the following morning was taken as evidence that mating had occurred. Embryos at different stages of development (2-cell, 8-cell and blastocyst) were flushed from the reproductive tract using HEPES-buffered human tubal fluid (HTF) medium (Quinn et al., 1985). Embryos were cultured for at least one hour in HTF bicarbonate-buffered medium at 37°C in an atmosphere of 5% CO<sub>2</sub> in humidified air. Both culture media contained 0.4% bovine serum albumin (BSA; Sigma).

### Tissues

Muscle, brain and liver membranes were prepared using methods described previously (Thorens et al., 1988). Briefly, tissues were homogenized in 4 volumes of 0.3 M sucrose, 3

mM dithiothreitol (DTT), 0.26 U/ml aprotinin and 0.1 mM phenylmethylsulfonyl fluoride (PMSF; Sigma). Homogenates were centrifuged for 10 minutes at 8000 rev/min and the supernatant was centrifuged for 20 minutes at the same speed. The cytosol was centrifuged for 40 minutes at 45000 rev/min and the pellet resuspended in 0.25 M sucrose, 50 mM Tris-HCl (pH 7.4), 100 mM KCl, 5 mM MgCl<sub>2</sub>. Protein determination was performed using Bradford protein assay (Bradford, 1976) with BSA as a standard.

### Antibodies

Polyclonal anti-peptide antibodies were raised in rabbits against the carboxyl-terminal 16 amino-acids of the rat GLUT1 and GLUT4 (Kahn et al., 1991), and against the carboxyl terminus of the mouse GLUT2 (Suzue et al., 1989). Controls included preimmune sera (GLUT1 and GLUT4) and undiluted antibody adsorbed by minced liver (GLUT2). Briefly, mouse liver was minced over ice and mixed with an equal volume of ice cold BWB medium (Gibco, Grand Island, NY) containing 0.5% polyvinylpyrrolidone (Sigma). After repeated washes the supernatant was removed and an equal volume of antibody was added to the pellet. After 40 minutes incubation on ice, the mixture was centrifuged to recover the adsorbed antibody. The specificity of the antisera to GLUT1 and GLUT4 was checked by immunoblotting from target tissues (brain and muscle), and from *Xenopus* oocyte extracts following microinjection with in vitro transcripts specific for GLUT1 and GLUT4 (Baldini et al., 1991). In the case of GLUT2, preabsorption of the antibody with the immunizing peptide completely blocked the reactivity of the antiserum to GLUT2 as detected by Western blotting of total liver lysate.

### Western blot analysis

Embryos at the desired developmental stage were flushed from the reproductive tract and cultured as described above (see Animals and embryo recovery). They were washed extensively, resuspended in Laemmli (1970) sample buffer containing 5%  $\beta$ -mercaptoethanol (Sigma), and boiled for 3 minutes. Groups of approximately 200 embryos were subjected to 12% 1D-SDS-PAGE electrophoresis using a minigel system (BioRad, Richmond, CA). The proteins were electrotransferred to nitrocellulose membranes overnight at 30 V, 4°C. Following transfer, Western blot analysis was carried out using two different methods: (1) Nitrocellulose membranes were washed for 10 minutes in distilled water; for 20 minutes in Tris-buffered saline (TBS: 20 mM Tris pH 7.4, 150 mM NaCl), 0.1% Tween-20 (Sigma); and for 30 minutes in TBS, 5% nonfat dry milk, 0.2% Nonidet P-40 (Sigma), at 37°C. Membranes were incubated with anti-GLUT1 antibody or the

preimmune serum diluted 1:200 for 2 hours at room temperature in TBS, 5% nonfat dry milk, 0.2% Nonidet P-40. The membranes were finally washed for 20 minutes in TBS, 0.1% Tween-20 and incubated in 0.25 mCi/ml  $^{125}$ I-Protein A (Amersham) for 30 minutes. Filters were washed again and exposed for autoradiography using Kodak X-OMAT AR film, at  $-70^{\circ}\text{C}$  (2) Filters were placed in the washing buffer (50 mM Tris, 150 mM NaCl pH 10.2, 5 mM sodium azide) for 6 hours and for 1 hour in the blocking buffer (washing buffer, 0.05% Tween-20, 5% nonfat dry milk) at room temperature. They were then incubated overnight at room temperature with anti-GLUT2 antibody (1:500), the adsorbed anti-GLUT2 (1:500), anti-GLUT4 antibody (1:1000), and the corresponding preimmune serum (1:1000). All antibodies were diluted in washing buffer, containing 0.05% Tween-20. The following morning, the filters were washed for 30 minutes in washing buffer, 0.05% Tween-20, prior to incubation with a 1:20000 dilution of horseradish peroxidase-conjugated goat anti-rabbit IgG (Sigma) at room temperature. The filters were finally washed for 50 minutes in washing buffer, 0.05% Tween-20, and incubated for 1 minute in the enhanced chemiluminescence reagents (ECL Western blotting detection system, Amersham). Exposure time to Kodak X-OMAT AR films was 5 to 30 seconds depending on the antibody used.

### High resolution immunoelectron microscopy

Blastocyst-stage embryos were flushed from the reproductive tract and immobilized on a lawn of 3T3 fibroblasts, using the methods described by Heyner et al. (1989). Embryos were fixed in 1% glutaraldehyde plus 0.2% picric acid in phosphate-buffered saline (PBS). Fixation was followed by dehydration in graded ethanols and embedding in LR White resin (London Resin Co Ltd.). Sections were floated on wetting/blocking solution (1% ovalbumin in PBS, pH 7.4) for 60 minutes at  $24^{\circ}\text{C}$  and then incubated with appropriately diluted IgG for 48 hours at  $4^{\circ}\text{C}$  in a humidified chamber. Sections were washed  $4\times$  in 1% ovalbumin in 10 mM sodium phosphate buffer, pH 8.0, and then incubated for 60 minutes with gold-labelled protein A. Sections were washed  $4\times$  with 10 mM Tris-HCl-buffered normal saline and deionized water prior to staining for 5 minutes in neutralized 2% aqueous uranyl acetate. The specificity of the immunoelectron microscopy staining of GLUT1 and GLUT2 proteins was assessed. Omission of immune IgG or substitution of pre- or non-immune IgG resulted in a 98% decrease in the number of cell-associated gold particles. Preincubation of immune antipeptide IgG to GLUT1 or GLUT2 with a 10-fold molar excess of its corresponding peptide decreased the number of gold particles by 92% (GLUT1) and 97% (GLUT2). Preincubation of GLUT1 antipeptide IgG with GLUT2 or GLUT4 peptide did not affect the number of gold particles observed. These results indicated that the gold-labelled protein A represented specific association of the labelled particle with specifically bound IgG.

## Results

### Western blot analysis

Western blot analysis detected GLUT1 (erythrocyte/brain) isoform at all stages of preimplantation development and in oocytes as well as on the positive control, the brain membrane preparation (Fig. 1A). At the blastocyst-stage, this protein had a relative molecular mass of approximately  $43\times 10^3$ , which is in keeping with published reports (Thorens et al., 1990). In oocytes and

cleavage-stage embryos, two bands of approximately 34 and  $20\times 10^3 M_r$  were strongly revealed whereas the  $43\times 10^3 M_r$  band was weakly detected. The preimmune serum failed to reveal any bands or proteins in the brain tissue (Fig. 1A), oocytes, cleavage-stage and blastocyst-stage embryos (data not shown).

The antibody directed against GLUT2 (the liver glucose transporter) did not react with oocytes or cleavage-stage embryos but detected a protein of  $59\times 10^3 M_r$  in blastocyst-stage embryos (Fig. 1B). The positive control, liver, also showed a band at the same position. When embryos were probed with anti-GLUT2 antibody, bands other than the  $59\times 10^3 M_r$  protein were also detected. No signal was observed when filters were probed with previously absorbed antibody.

The analysis of GLUT4 (the muscle/adipocyte isoform) revealed a band around  $50\times 10^3 M_r$  when muscle was the target tissue but no reactivity with oocytes, cleavage-stage, or blastocyst-stage embryos (Fig. 1C). Although the  $50\times 10^3 M_r$  protein was not detected at any preimplantation stage, a band of approximately  $59\times 10^3 M_r$ , which is most likely non-specific, was found in oocytes and blastocyst-stage embryos.

### High resolution immunoelectron microscopy

The GLUT1 isoform was readily detectable in trophoblast and inner cell mass cells of the mouse blastocyst, and was associated with intracellular membranes as well as plasma membranes of all cell types (Fig. 2). In contrast, the GLUT2 isoform was restricted to membranes of the trophoblast that faced the blastocyst cavity, and was not present on the apical surface facing the zona pellucida. A small amount of GLUT2 was found in intracellular vesicles of the trophoblast. Inner cell mass membranes exhibited localization on both apical and basal surfaces as well as on intracellular vesicles (Fig. 3). GLUT4 isoform was not detectable on any developmental stages of mouse embryogenesis that were studied (Fig. 4A), although immunostaining revealed reactivity with control target adipocyte tissue (Fig. 4B). Immunoelectron microscopic staining of mouse embryos with other GLUT4 antibodies, as described by Smith et al. (1991), also failed to detect GLUT4 proteins. Differences seen in the extent of labelling, i.e. in the number of gold protein A particles, with the GLUT1 and 2 antibodies does not necessarily correlate with the actual number of each transporter isoform in the blastocyst. Unknown differences in the affinity of the antibodies along with other factors preclude these comparisons. A variety of controls (described in Materials and methods) demonstrated the specificity of the immunoelectron microscopic staining.

## Discussion

At a physiological concentration (1 mM), glucose uptake by mouse preimplantation embryo is carrier-mediated and is detectable from the 2-cell stage onwards. This transport is mediated by facilitated

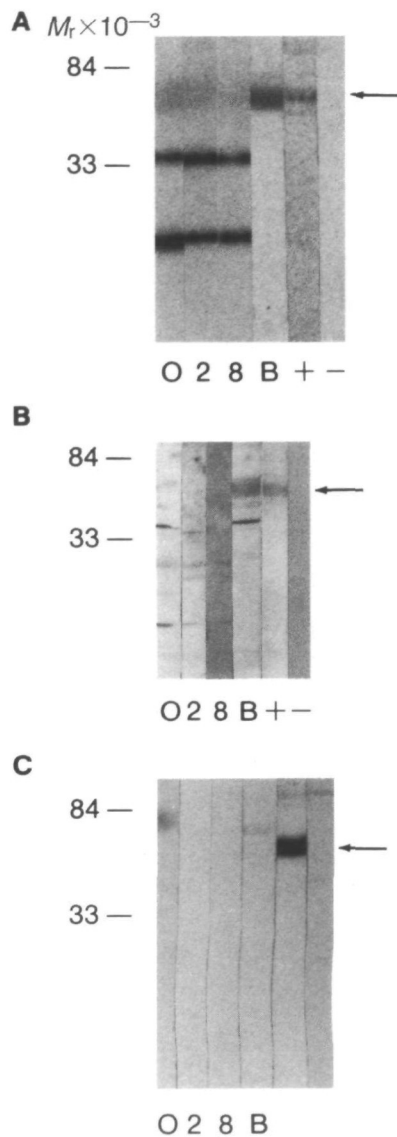

diffusion, and the sodium-coupled glucose transport system does not seem to play a role (Gardner and Leese, 1988). However, studies in mouse blastocysts using higher concentrations of glucose (5.6 mM) have shown a significant decrease in glucose uptake when embryos were cultured in sodium-free media (Manejwala et al., 1989). Moreover, Wiley et al. (1991) have shown the presence of an antigen that is similar to a renal  $\text{Na}^+$ /glucose cotransporter at the cell surface of preimplantation mouse embryos. This observation seems to agree with the hypothesis that solute transport systems that become apically restricted during compaction might participate in the early events in the establishment of apical-basal cell polarity across the mouse blastomere (Wiley and Obasaju, 1988, 1989). Further investigation will be needed to resolve reports regarding the involvement of the  $\text{Na}^+$ /glucose cotransporter in glucose uptake during mouse preimplantation development.

Recent studies have shown that facilitative transport of glucose across the plasma membrane is mediated by

**Fig. 1.** Detection of glucose transporter proteins in mouse preimplantation embryos. Groups of approximately 200 oocytes (O), 2-cell (2), 8-cell (8), blastocyst-stage (B) embryos and control tissues were subjected to Western blot analysis as described in Materials and methods. (A) Detection of the GLUT1 isoform. Blastocyst-stage embryos (lane B) showed a strong band of approximately  $43 \times 10^3 M_r$  (arrow). The same band was weakly detected in oocytes (lane O) and cleavage-stage embryos (lanes 2 and 8) whereas two other bands ( $\approx 34$  and  $20 \times 10^3 M_r$ ), most likely representing embryonic isoforms, were revealed at these stages. The brain tissue preparation also showed the expected  $43 \times 10^3 M_r$  protein (arrow) when incubated with the immune serum (lane +), but incubation with the preimmune serum failed to detect any protein (lane -). (B) Detection of GLUT2 (arrow), a  $59 \times 10^3 M_r$  protein, in blastocyst-stage embryos (lane B). The liver tissue showed a band at the same position when probed with anti-GLUT2 antibody (lane +) but not with previously absorbed antibody (lane -). Bands other than the  $59 \times 10^3 M_r$  were detected at all stages of development (lanes O, 2, 8 and B) representing either non-specific reactions with the antiserum or some embryonic versions of GLUT2. (C) GLUT4 (arrow) was detected when the muscle tissue was incubated with the immune serum (lane +) and no reactivity was found with the preimmune serum (lane -). GLUT4 was not detected at any preimplantation stage (lanes O, 2, 8 and B), although a non-specific band was present in oocytes (lane O) and blastocyst-stage embryos (lane B).

glucose transporter proteins, a group of structurally related proteins that possess distinct tissue distributions (reviewed by Gould and Bell, 1990; Thorens et al., 1990). In this study, we examined the expression of three isoforms, GLUT1, GLUT2 and GLUT4 at different stages of development in mouse preimplantation embryos. Western blot analysis detected GLUT1 throughout preimplantation development stages as well as in oocytes. The 34 and  $20 \times 10^3 M_r$  bands seen in oocytes and in cleavage-stage embryos might represent early embryonic isoforms of GLUT1 and/or a difference in glycosylation of the protein at these stages. High resolution immunoelectron microscopy revealed a widespread distribution of this isoform in the cells at the blastocyst-stage. This observation is not surprising since the low  $K_m$  GLUT1 is known to be responsible for basal glucose uptake in most fetal and adult tissues and is also induced in hepatoma and insulinoma cells (Unger, 1991), where there is an increased demand for glucose in response to rapid cellular proliferation.

We did not detect the GLUT2 protein until the blastocyst-stage, although studies using the reverse-transcriptase polymerase chain reaction (RT-PCR), have detected the mRNA for this isoform at the late 8-cell stage (Hogan et al., 1991). The bands other than the  $59 \times 10^3 M_r$  ones present on the Western blots may be non-specific, given the polyclonal nature of the antibody. They may also represent embryonic versions of GLUT2 with different glycosylation patterns. Several pieces of evidence suggest that GLUT2 is required for normal glucose sensing by pancreatic  $\beta$ -cells (Thorens et al., 1990): first, it is localized to the microvillar

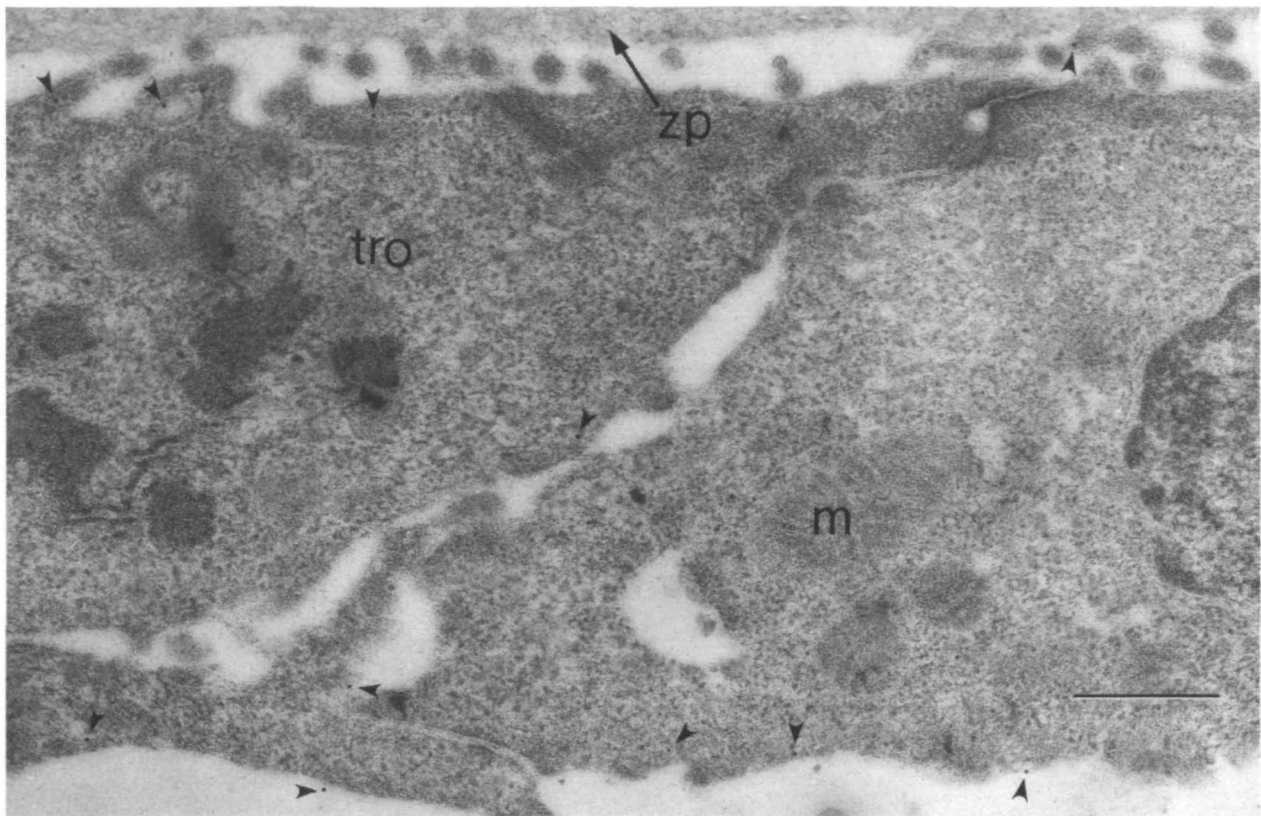

**Fig. 2.** Immunoelectron microscopic localization of GLUT1 on mouse embryo blastocyst. Mouse embryos were prepared for immunoelectron microscopy and stained with GLUT1 antipeptide antibody (50  $\mu\text{g/ml}$ ) as described in Materials and methods. Antibody binding was detected with gold-labelled protein A (arrowheads). GLUT1 was found on cells of the trophoblast and inner cell mass. GLUT1 was randomly distributed along apical, basolateral, and intercellular portions of the plasma membrane of these cells. Approximately 50% of the particles were found in intracellular subplasma membrane vesicles. tro, trophoblast, m, mitochondrion, zp, zona pellucida. Bar, 0.5  $\mu\text{m}$ .

membranes in  $\beta$ -islet cells, second; its  $K_m$  (15–20 mM) for glucose is in the concentration range that stimulates insulin release; and third, its expression is drastically reduced in insulinomas that are no longer normally responsive to glucose. From studies in glucose-intolerant Zucker fatty rats, a model for non-insulin-dependent diabetes (reviewed by Unger, 1991), it seems that decreased glucose uptake by pancreatic  $\beta$ -cells and the resulting insulinopenia is due to a decrease in GLUT2 mRNA transcription and GLUT2 protein synthesis in these cells.

At the blastocyst-stage, the first two cell lineages are established and the first intraembryonic fluid is formed. The inner cell mass will give rise to the embryo proper and the trophoblast to extraembryonic tissues. It is tempting to speculate that the expression of the GLUT2 isoform at this stage might reflect an early homeostatic role for this transporter. This idea is supported by the observation of the GLUT2 distribution, which in high resolution immunoelectron microscopy studies, was found in the cells facing the blastocoel cavity and not in those facing the zona pellucida. Further studies examining the expression of GLUT2 protein in environments with varying levels of glucose are needed in order to

establish the role of GLUT2 as a “glucose sensor” in the mouse preimplantation embryo.

Although a number of studies have established the anabolic and proliferative effects of insulin on early mouse embryos (Harvey and Kaye, 1988, 1990; Heyner et al., 1989; Rao et al., 1990; Gardner and Kaye, 1991), the effects of insulin on glucose uptake by preimplantation mammalian embryos are not entirely clear. Functional studies in mouse (Gardner and Leese, 1988) and in rabbit blastocysts (Robinson et al., 1990) have led to the conclusion that glucose uptake was not affected by physiological levels of insulin. In contrast, Gardner and Kaye (1984) described an increase of approximately 2-fold in the glucose uptake by preimplantation mouse embryos in the presence of pharmacological concentrations of insulin (1  $\mu\text{g/ml}$ ). A similar 2-fold increase in GLUT1 translocation to the plasma membrane has been reported in insulin-treated fat cells (Zorzano et al., 1989).

Since insulin receptor expression (Mattson et al., 1988; Heyner et al., 1989) as well as mRNA encoding the insulin receptor (Schultz et al., 1990) have been detected in mouse preimplantation embryos, glucose uptake could potentially be influenced by insulin.



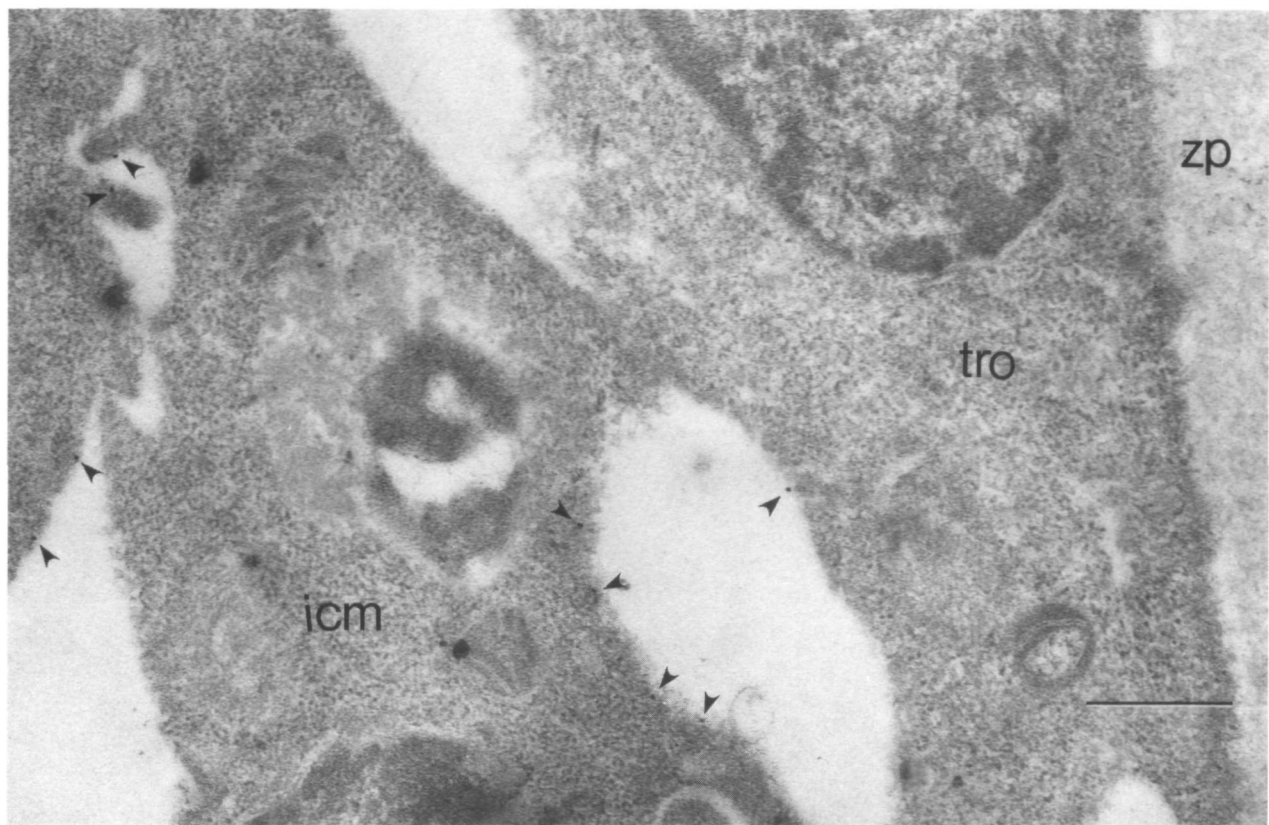

**Fig. 3.** Immunoelectron microscopic localization of GLUT2 on mouse embryo blastocyst. Mouse embryos were prepared for immunoelectron microscopy and stained with GLUT2 anti-peptide antibody ( $50 \mu\text{g/ml}$ ) as described in Materials and methods. Antibody binding was detected with gold-labelled protein A (arrowheads). GLUT2 was found on cells of the trophoblast and inner cell mass. GLUT2 was randomly distributed along all portions of the plasma membrane of inner mass cells and in subplasma membrane vesicles. GLUT2 was not found on the apical plasma membrane of trophoblast cells facing the zona pellucida. GLUT2 was randomly distributed on the basolateral surface and plasma membrane between adjoining cells. A small percentage of the particles ( $<15\%$ ) were found in intracellular vesicles. tro, trophoblast; icm, inner cell mass; zp, zona pellucida. Bar,  $0.5 \mu\text{m}$ .

However, in the present study, using Western blotting and high resolution immunoelectron microscopy, expression of the major insulin-regulatable GLUT4 isoform has not been demonstrated at any stage of preimplantation development. Similarly, previous studies of mRNA expression and cellular detection by immunofluorescence microscopy did not provide evidence of GLUT4 expression during this developmental period in the mouse (Hogan et al., 1991). Moreover, RT-PCR experiments did not show any expression of GLUT4 mRNA in "muscle primordia" cells in post-implantation mouse embryos, at 9.5 days post-coitum (Hogan et al., 1991). Taken together these results suggest that GLUT4 isoform may not be expressed until fetal  $\beta$ -cell differentiation, and any effect of exogenous insulin during preimplantation development must be via the GLUT1 isoform.

In insulin-responsive tissues such as adipose and muscle tissues, insulin causes an increase in glucose uptake by mediating the translocation of GLUT4 from intracytoplasmic pools to the plasma membrane (Cushman and Wardzala, 1980; Suzuki and Kono, 1980; Charron et al., 1989). More specifically, studies in the

rat white adipocyte (Smith et al., 1991) suggest that insulin may cause the movement of GLUT4 from subplasma membrane vesicles to the plasma membrane, in addition to inducing a change in GLUT4 conformation. Additionally, evidence provided by experimental models of insulinopenia (fasting and diabetic rats) suggests that insulin also controls GLUT4 expression at the pretranslational level (Gould and Bell, 1990). When cultured at a physiological concentration of glucose, 40% of blastocyst-stage embryos from streptozotocin-induced diabetic rats were degenerate and showed impaired glucose uptake (Brison and Leese, 1990). However, these authors showed that in those blastocysts that developed normally, there was no impairment of glucose uptake, supporting the hypothesis that glucose uptake is insulin-insensitive.

Besides the importance of insulin plasma levels in the regulation of glucose uptake, it is now well established that insulin is more effective biologically when it is delivered in pulses rather than continuously (see review by Lefèbvre et al., 1987). The insulin found in the mouse preimplantation embryo is of maternal origin (Heyner et al., 1989), and the rapid pulsatile fluctu-

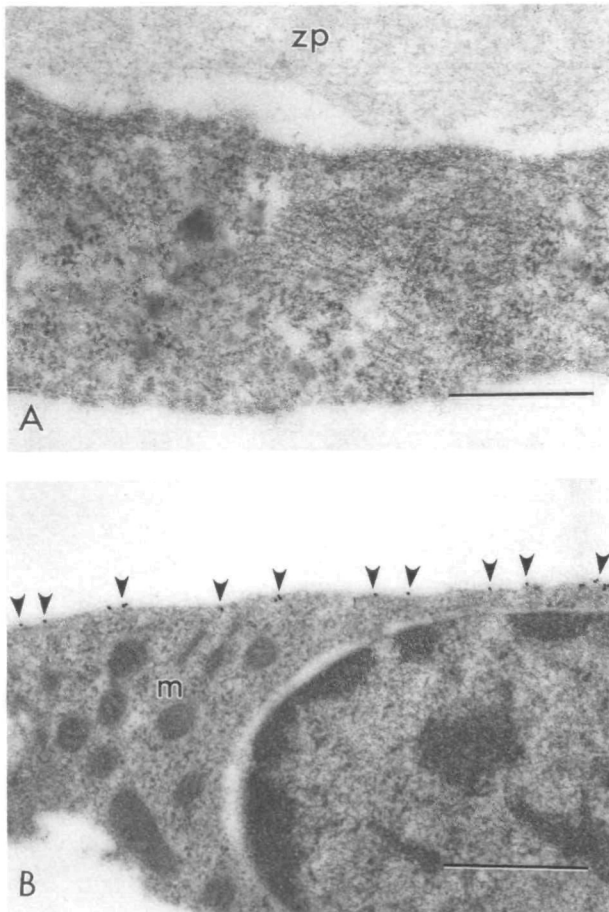

**Fig. 4.** Immunoelectron microscopic localization of GLUT4 on mouse embryo blastocyst (A) and rat adipocyte (B). Mouse embryos were prepared for immunoelectron microscopy as described in Materials and methods, rat adipocytes, incubated for 30 minutes with 10 ng/ml insulin, were prepared as described previously (Smith et al., 1991). Both were stained with GLUT4 antipeptide antibody (50  $\mu$ g/ml) as described in Materials and methods. Antibody binding was detected with gold-labelled protein A (arrowheads). No significant labelling of GLUT4 was detected in mouse blastocysts. In contrast, labelling of GLUT4 in the plasma membrane of insulin-treated rat adipocytes was extensive. m, mitochondrion; zp, zona pellucida. Bar, 0.5  $\mu$ m

ations of its level in blood, due to the oscillatory pattern of its secretion, might disappear after diffusion in the reproductive tract. Therefore, the absence of GLUT4 expression in our studies might be related to an insufficient level of insulin or to an inadequate cyclic pattern of its concentration during preimplantation. Establishing the ontogeny of GLUT4 expression during postimplantation development will provide more insight into this question.

We are grateful to Neelimah Shah for her technical assistance. This work was supported by NIH grants HD 23511, DK 19525, DK 28143 and in part by a grant of La Fondation L. Fredericq (Belgium) to M. A.

## References

- Baldini, G., Hohman, R., Charron, M. J. and Lodish, H. F. (1991) Insulin and nonhydrolysable GTP analogs induce translocation of GLUT4 to the plasma membrane in alpha-toxin-permeabilized rat adipose cells. *J. Biol. Chem.* **266**, 4037-4040.
- Bell, G. I., Kayano, T., Buse, J. B., Burant, C. F., Takeda, J., Lin, D., Fukumoto, H. and Seino, S. (1990) Molecular biology of mammalian glucose transporters. *Diabetes Care* **13**, 198-208.
- Benos, D. J. (1981) Developmental changes in epithelial transport characteristics of preimplantation rabbit blastocysts. *J. Physiol.* **316**, 191-202.
- Biggers, J. D. and Borland, R. M. (1976) Physiological aspects of growth and development of the preimplantation embryo. *Ann. Rev. Physiol.* **38**, 95-119.
- Bradford, M. M. (1976) A rapid and sensitive method for the quantitation of micrograms quantities of protein utilizing the principle of protein-dye binding. *Anal. Biochem.* **72**, 248-254.
- Brison, D. R. and Leese, H. J. (1990) Glucose uptake by embryos from diabetic rats. Society for the Study of Fertility Winter Meeting, London, 17-18 December, 1990. *J. Reprod. Fert.*, Abstract Series No 6, p 40.
- Charron, M. J., Brosius, F. C., Alper, S. L. and Lodish, H. F. (1989) A glucose transport protein expressed predominantly in insulin-responsive tissues. *Proc. Natl. Acad. Sci. USA* **86**, 2535-2539.
- Cushman, S. W. and Wardzala, L. J. (1980) Potential mechanism of insulin action on glucose transport in the isolated rat adipose cell; apparent translocation of intracellular transport systems to the plasma membrane. *J. Biol. Chem.* **255**, 4758-4762.
- de Herreros, A. G. and Birnbaum, M. J. (1989) The regulation by insulin of glucose transporter gene expression in 3T3 adipocytes. *J. Biol. Chem.* **264**, 9885-9890.
- Esposito, G. (1984) Intestinal permeability of water-soluble nonelectrolytes, sugars, amino acids, peptides. In *Pharmacology of Intestinal Permeability* (ed T. Z. Czaky), pp 567-611. New York: Springer-Verlag.
- Gardner, D. K. and Leese, H. J. (1988) The role of glucose and pyruvate transport in regulating nutrient utilization by preimplantation embryos. *Development* **104**, 423-429.
- Gardner, H. G. and Kaye, P. L. (1984) Effects of insulin on preimplantation mouse embryos. *Proc. 16th Ann. Conf. Aust. Soc. Reprod. Biol.* p. 107 (abstract).
- Gardner, H. G. and Kaye, P. L. (1991) Insulin increases cell numbers and morphological development in mouse preimplantation embryos in vitro. *Reprod. Fert. Dev.* **3**, 79-91.
- Gould, G. W. and Bell, G. I. (1990) Facilitative glucose transporters: an expanding family. *Trends Biochem. Sci.* **15**, 18-23.
- Harvey, M. B. and Kaye, P. L. (1988) Insulin stimulates protein synthesis in compacted mouse embryos. *Endocrinology* **116**, 261-263.
- Harvey, M. B. and Kaye, P. L. (1990) Insulin increases the cell number of the inner cell mass and stimulates morphological development of mouse blastocysts in vitro. *Development* **110**, 963-967.
- Hediger, M. A., Coady, M. J., Ikeda, T. S. and Wright, E. M. (1987) Expression cloning and cDNA sequencing of the Na<sup>+</sup>/glucose cotransporter. *Nature* **330**, 379-381.
- Heyner, S., Rao, L. V., Jarrett, L. and Smith, R. M. (1989) Preimplantation mouse embryos internalize maternal insulin via receptor-mediated endocytosis: pattern of uptake and functional correlations. *Dev. Biol.* **134**, 48-58.
- Hogan, A., Heyner, S., Charron, M. J., Copeland, N. G., Gilbert, D. J., Jenkins, N. A., Thorens, B. and Schultz, G. A. (1991) Glucose transporter gene expression in early mouse embryos. *Development* **113**, 363-372.
- Kahn, B. B., Rossetti, L., Lodish, H. F. and Charron, M. J. (1991) Decreased in vivo glucose uptake but normal expression of GLUT1 and GLUT4 in skeletal muscle of diabetic rats. *J. Clin. Invest.* **87**, 2197-2206.
- Kasanicki, M. A. and Pilch, P. F. (1990) Regulation of glucose-transporter function. *Diabetes Care* **13**, 219-227.
- Laemmli, U. K. (1970) Cleavage of structural proteins during the assembly of the head of bacteriophage T4. *Nature* **227**, 680-685.
- Lefebvre, P. J., Paolisso, G., Scheen, A. J. and Henquin, J. C. (1987)

- Pulsatility of insulin and glucagon release: physiological significance and pharmacological implications *Diabetologia* **30**, 443-452.
- Manejwala, F. M., Cragoe Jr, E. J. and Schultz, R. M.** (1989) Blastocoel expansion in the preimplantation mouse embryo: role of extracellular sodium and chloride and possible apical routes of their entry. *Devl Biol* **133**, 210-220.
- Mattson, B. A., Rosenblum, I. Y., Smith, R. M. and Heyner, S.** (1988) Autoradiographic evidence for insulin and insulin-like growth factor binding to early mouse embryos. *Diabetes* **37**, 585-589.
- Quinn, P., Kerin, J. F. and Warnes, G. M.** (1985). Improved pregnancy rate in human in vitro fertilization with the use of a medium based on the composition of human tubal fluid. *Fertil Steril* **44**, 493-498.
- Rao, L. V., Wikarczuk, M. L. and Heyner, S.** (1990) Functional roles of insulin and insulinlike growth factors in preimplantation mouse embryo development. *In Vitro Cell Dev Biol* **26**, 1043-1048.
- Robinson, D. H., Smith, P. R. and Benos, D. J.** (1990). Hexose transport in preimplantation rabbit blastocyst. *J Reprod Fert* **89**, 1-11.
- Schultz, G. A., Dean, W., Hahnel, A., Telford, N., Rappolee, D., Werb, Z. and Pederson, R.** (1990) Changes in RNA and protein synthesis during the development of the preimplantation mouse embryo. In *Early Embryo Development and Paracrine Relationships* (ed S Heyner and L M Wiley) UCLA Symposia on Molecular and Cellular Biology, New series 117, pp 27-46. New York: A R Liss.
- Smith, R. M., Charron, M. J., Shah, N., Lodish, H. F. and Jarrett, L.** (1991) Immunoelectron microscopic demonstration of insulin-stimulated translocation of glucose transporters to the plasma membrane of isolated rat adipocytes and masking of the carboxyl-terminal epitope of intracellular GLUT4. *Proc Natl Acad Sci USA* **88**, 6893-6897.
- Suzue, K., Lodish, H. F. and Thorens, B.** (1989) Sequence of the mouse liver glucose transporter. *Nucl Acid Res* **17**, 10099.
- Suzuki, K. and Kono, T.** (1980). Evidence that insulin causes translocation of glucose transport activity to the plasma membrane from an intracellular storage site. *Proc Natl. Acad Sci USA* **5**, 2542-2545.
- Thorens, B., Charron, M. J. and Lodish, H. F.** (1990). Molecular physiology of glucose transporters. *Diabetes Care* **13**, 209-218.
- Thorens, B., Sarkar, H. K., Kaback, H. R. and Lodish, H. R.** (1988) Cloning and functional expression in bacteria of a novel glucose transporter present in liver, intestine, kidney, and B-pancreatic islet cells. *Cell* **55**, 281-290.
- Unger, R. H.** (1991) Diabetic hyperglycemia: Link to impaired glucose transport in pancreatic  $\beta$  cells. *Science* **251**, 1200-1205.
- Walker, P. S., Ramlal, T., Donovan, J. A., Doering, T. P., Sandra, A., Klips, A. and Pessin, J. E.** (1989) Insulin and glucose-dependent regulation of the glucose transport system in the rat L6 skeletal muscle cell line. *J Biol Chem* **264**, 6587-6595.
- Wheeler, T. J. and Hinkle, P. C.** (1985) The glucose transporter of mammalian cells. *Ann Rev Physiol* **47**, 503-517.
- Wiley, L. M., Lever, J. E., Pape, C. and Kider, G. M.** (1991). Antibodies to a renal  $\text{Na}^+$ /glucose cotransport system localize to the apical membrane domain of polar mouse embryo blastomeres. *Devl Biol* **143**, 149-161.
- Wiley, L. M. and Obasaju, M. F.** (1988) Induction of cytoplasmic polarity in heterokaryons of mouse 4-cell-stage blastomeres fused with 8-cell- and 16-cell-stage blastomeres. *Devl Biol* **130**, 276-284.
- Wiley, L. M. and Obasaju, M. F.** (1989) Effects of phlorizin and ouabain on the polarity of mouse 4-cell/16-cell stage blastomere heterokaryons. *Devl Biol* **133**, 375-384.
- Zorzano, A., Wilkinson, W., Kotliar, N., Thoddis, G., Wadzinski, B. E., Ruoho, A. E. and Pilch, P. F.** (1989) Insulin-regulated glucose uptake in rat adipocytes is mediated by two transporter isoforms present in at least two vesicle populations. *J Biol Chem* **264**, 12358-12363.

(Accepted 24 February 1992)
